# Supplementary material
Source: publisher site journal article supplement (https://www.dovepress.com/article/246697)
Supplement: Supplementary file 1 [file get_supplementary_file.php]

**Supplementary Figures**


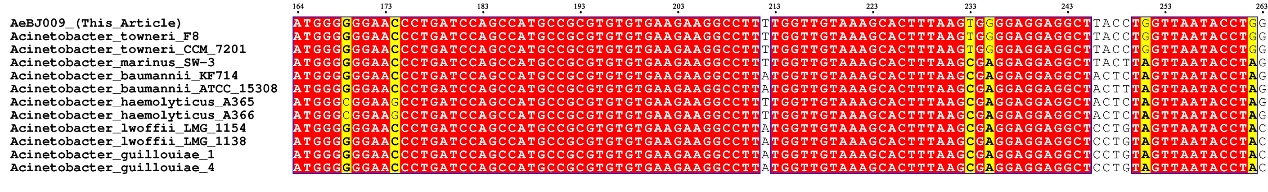


**Figure S1.** Multiple sequence alignment of 16S rRNA gene from Acinetobacter species. The region of 164-263 from the 16S rRNA gene alignment was selected. The sites of 233, 235, 251 and 262 in the segment distinguish *Acinetobacter towneri* from other species.


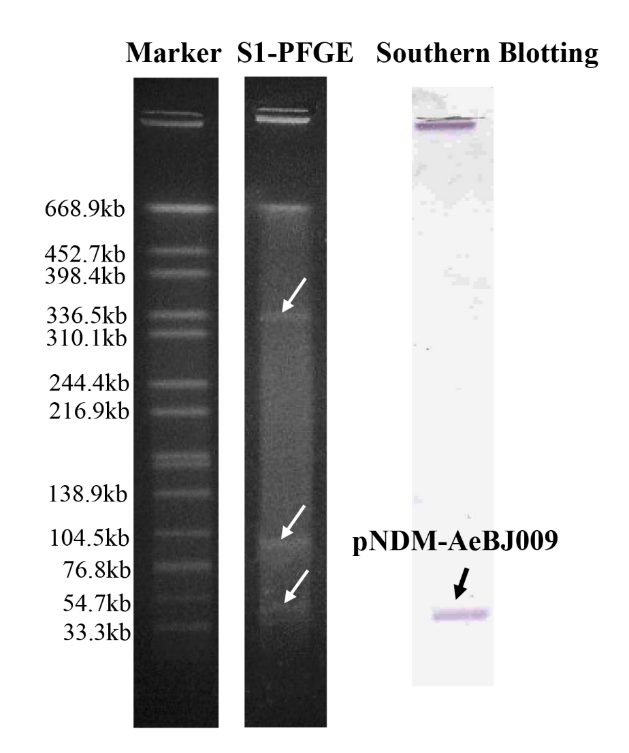


**Figure S2.** S1-PFGE for strain AeBJ009 and southern blotting for the *bla*NDM-1 gene. Lanes: Marker, *Salmonella* serotype Braenderup strain H9812 as the size standard; S1-PFGE, S1-PFGE result for S1-digested plasmid DNA of strain AeBJ009, white arrows were used to indicate plasmids of strain AeBJ009; Southern Blotting, Southern blotting hybridization with the probe specific to *bla*NDM-1.
